# Supplementary material
Source: PubMed Central journal article supplement (PMC5496704)
Supplement: Appendix_585.pdf [file Appendix_585.pdf]

**Table S1. Studies of local soft tissue and intra-articular corticosteroid injection effects on blood glucose levels in patients with diabetes**

| Study                         | Condition | Site of Injection | Type of Steroid | N (DM:NDM) | Type of DM | Preinjection HbA1C (%) Levels / Baseline BGL | Peak BGL Increase      | Time to Peak BGL       | Time to Return to Baseline | Definition of Significant BGL Increase |
|-------------------------------|-----------|-------------------|-----------------|------------|------------|----------------------------------------------|------------------------|------------------------|----------------------------|----------------------------------------|
| Habib et al <sup>10</sup>     | OA        | Knee              | MPA             | 9 (9:0)    | T2         | HgA1C <7.0                                   | 165-500<br>(mean, 320) | 5-84 h<br>(mean, 57 h) | 42-102 h<br>(mean, 65 h)   | 2 SD above mean baseline               |
| Habib and Safia <sup>12</sup> | OA        | Knee              | CC              | 6 (6:0)    | T2         | HgA1C <7.0                                   | 251-430                | 2-34 hrs               | 18-72 hrs                  | 2 SD above mean baseline               |
| Habib and Miari <sup>11</sup> | OA        | Knee              | TAH             | 12 (12:0)  | T2         | HgA1C <7.0                                   | 239.5 (180-317)        | 32.5 (2-58)            | 74.5 h (60-102 h)          | 2 SD above mean baseline               |
|                               |           |                   | TA              | 12(12:0)   |            |                                              | 288 (249-316)          | 24.5 (12-50)           | 77 h (62-92 h)             |                                        |

|                                   |                      |             |     |           |             |                                                   |                                               |                                             |                                     |                                                    |
|-----------------------------------|----------------------|-------------|-----|-----------|-------------|---------------------------------------------------|-----------------------------------------------|---------------------------------------------|-------------------------------------|----------------------------------------------------|
| Habib and Abu-Ahmad <sup>9</sup>  | AC, RCT, CT          | Shoulder    | MPA | 18 (18:0) | T2          | HgA1C 7.55 ± 1.089                                | Not stated                                    | Day 7 after lunch and on day 1 after supper | Not stated                          | Statistically significant difference from baseline |
| Moon et al <sup>15</sup>          | AC                   | Shoulder    | TA  | 15 (7:8)  | T2          | HgA1C 6.5 ±0.6, BG 122.3 ±15.5                    | Mean 135.8 ± 38.3                             | Day 1                                       | Day 7                               | Statistically significant difference from baseline |
| Wang and Hutchinson <sup>20</sup> | TF                   | Hand        | MPA | 18 (18:0) | 6 T1, 12 T2 | None stated                                       | Mean 150-250                                  | AM on post-injection day 1                  | None stated, but decreased by day 5 | Statistically significant difference from baseline |
| Kim et al <sup>13</sup>           | TF, DQT, CTS, OA, WT | Hand, wrist | TA  | 25 (25:0) | 5 T1, 20 T2 | HgA1C 6.8 (range, 5.6-10); BG 117 (range, 87-160) | 5 patients >180; 9 patients >50 from baseline | Day 1                                       | 5 days                              | BG >180 or over 50 (80%) above baseline            |

|                             |                       |                                    |     |           |            |                                                                               |                                                                                            |                                         |                          |                                                                                 |
|-----------------------------|-----------------------|------------------------------------|-----|-----------|------------|-------------------------------------------------------------------------------|--------------------------------------------------------------------------------------------|-----------------------------------------|--------------------------|---------------------------------------------------------------------------------|
| Catalano et al <sup>7</sup> | DQT, TF,<br>CTS, FCUT | Hand, wrist                        | TA  | 23(23:0)  | Not stated | HgA1C 6.6<br>(5.3-7.9); BG<br>AM 125 (91-<br>201) and PM<br>153 (110-<br>200) | 518 mg/dl<br>(mean,<br>125-310)                                                            | Variable<br>(immediate-4<br>weeks)      | AM 7 days;<br>PM 10 days | 2 times the<br>standard<br>deviation of<br>preinjection<br>values or BG<br>>180 |
| Stepan et al <sup>18</sup>  | DQT, TF,<br>OA, CTS   | Hand, wrist                        | MPA | 40 (40:0) | 7T1, 33T2  | 7.1 (6-10),<br>138                                                            | Mean pre-<br>and post-<br>injection<br>difference<br>in BGL 43.3<br>(95% CI,<br>19.4–67.1) | Day 1                                   | Day 3                    | Mean 20<br>mg/dl<br>difference<br>from<br>baseline<br>BGL post-<br>injection    |
| Uboldi et al <sup>19</sup>  | IA                    | Knee, wrist,<br>shoulder,<br>ankle | TA  | 16 (12:4) | Not stated | Not stated                                                                    | Mean 120-<br>140 in NDM<br>and mean<br>140-175 in<br>DM                                    | 2 hours in<br>non-DM; 12<br>hours in DM | 24 hours                 | Statistically<br>significant<br>difference<br>from baseline                     |

AC, adhesive capsulitis; BGL, blood glucose levels (reported as mg/dL); CC, celestone chronodose; CT, calcific tendinitis; CTS, carpal tunnel syndrome; DM, diabetes mellitus; DQT, DeQuervain's tenosynovitis; FCUT, flexor carpi ulnaris tendonitis; IA,

inflammatory arthritis; MPA, methylprednisolone acetate; NDM, non-diabetes mellitus; OA, osteoarthritis; RCT, rotator cuff tear; TA, triamcinolone acetonide; TAH, triamcinolone hexacetonide; TF, trigger finger.
